# Supplementary material for: BranchClust: a phylogenetic algorithm for selecting gene families
Source: Springer Nature journal article supplement (doi:10.1186/1471-2105-8-120), 2007-04-10
Supplement: 12859_2006_1492_MOESM23_ESM.pdf [file 12859_2006_1492_MOESM23_ESM.pdf]

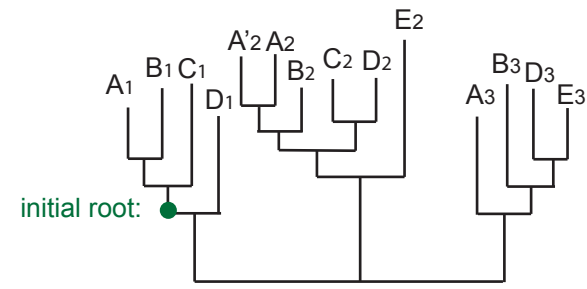

A

The most distant leaves from the root:

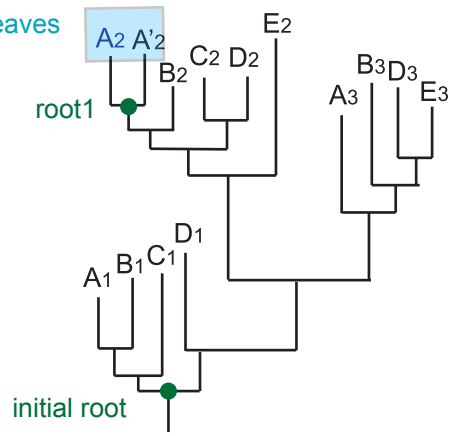

B

The most distant leaves from the root:

Selection starts here

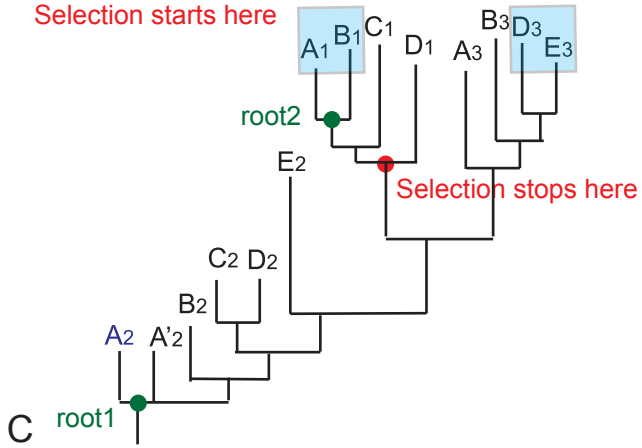

C

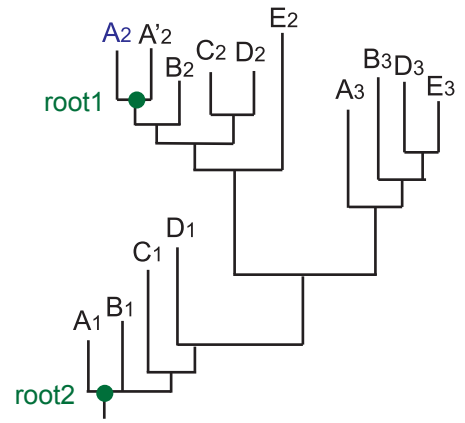

D

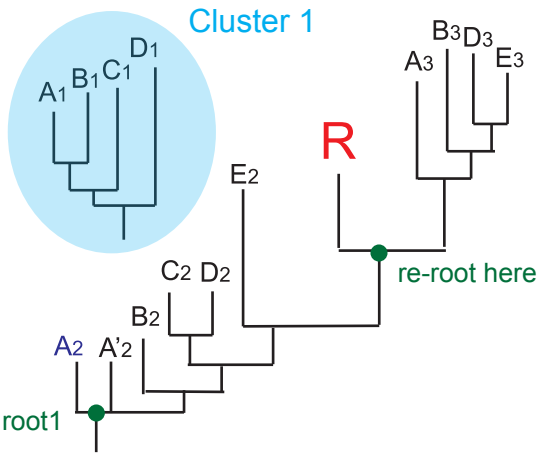

E

The most distant leaves from the root:

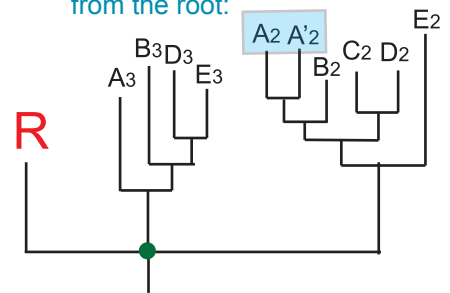

F

Cluster 2

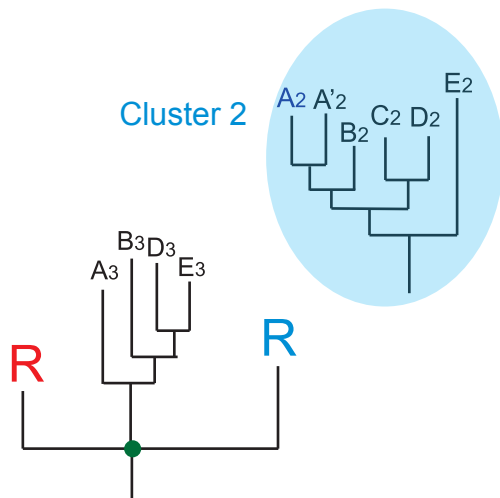

G

Cluster 3

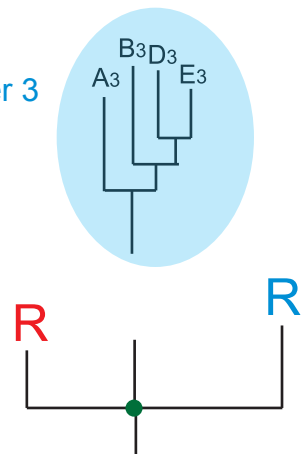

H
