# Supplementary material for: BranchClust: a phylogenetic algorithm for selecting gene families
Source: Springer Nature journal article supplement (doi:10.1186/1471-2105-8-120), 2007-04-10
Supplement: 12859_2006_1492_MOESM29_ESM.pdf [file 12859_2006_1492_MOESM29_ESM.pdf]

15837745 13:13  
 21230027 13:13  
 21244376 13:13  
 27904521 13:13  
 32490755 13:13  
 15642757 13:13  
 26250476 13:13  
 16767149 13:13  
 16124229 13:13  
 22128005 13:13  
 15603355 13:13  
 16272426 13:13  
 15600749 13:13

■ fam  
 ■ inpar  
 ■ outpar

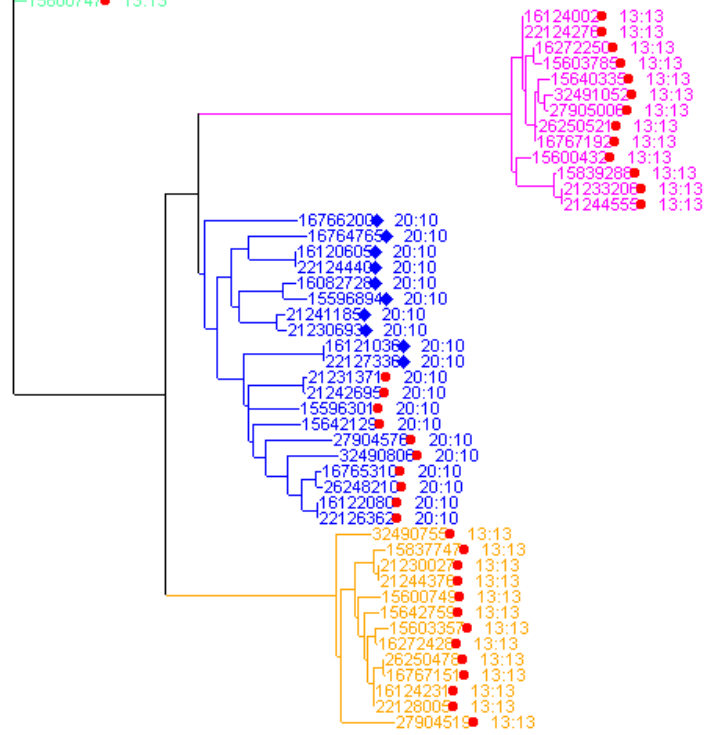

*Xylella fastidiosa* 9a5c  
*Xanthomonas campestris* pv. *campestris* str. ATCC 33913  
*Xanthomonas axonopodis* pv. *citri* str. 306  
*Buchnera aphidicola* str. Bp (Baizongia pistaciae)  
*Wigglesworthia glossinidia* endosymbiont of *Glossina brevipalpis*  
*Vibrio cholerae* O1 biovar *eltor* str. N16961  
*Escherichia coli* CFT073  
*Salmonella typhimurium* LT2  
*Yersinia pestis* CO92  
*Yersinia pestis* KIM  
*Pasteurella multocida* subsp. *multocida* str. Pm70  
*Haemophilus influenzae* Rd KW20  
*Pseudomonas aeruginosa* PAO1  
*Yersinia pestis* CO92  
*Yersinia pestis* KIM  
*Haemophilus influenzae* Rd KW20  
*Pasteurella multocida* subsp. *multocida* str. Pm70  
*Vibrio cholerae* O1 biovar *eltor* str. N16961  
*Wigglesworthia glossinidia* endosymbiont of *Glossina brevipalpis*  
*Buchnera aphidicola* str. Bp (Baizongia pistaciae)  
*Escherichia coli* CFT073  
*Salmonella typhimurium* LT2  
*Pseudomonas aeruginosa* PAO1  
*Xylella fastidiosa* 9a5c  
*Xanthomonas campestris* pv. *campestris* str. ATCC 33913  
*Xanthomonas axonopodis* pv. *citri* str. 306  
*Salmonella typhimurium* LT2  
*Salmonella typhimurium* LT2  
*Yersinia pestis* CO92  
*Yersinia pestis* KIM  
*Yersinia pestis* CO92  
*Pseudomonas aeruginosa* PAO1  
*Xanthomonas axonopodis* pv. *citri* str. 306  
*Xanthomonas campestris* pv. *campestris* str. ATCC 33913  
*Yersinia pestis* CO92  
*Yersinia pestis* KIM  
*Xanthomonas campestris* pv. *campestris* str. ATCC 33913  
*Xanthomonas axonopodis* pv. *citri* str. 306  
*Pseudomonas aeruginosa* PAO1  
*Vibrio cholerae* O1 biovar *eltor* str. N16961  
*Buchnera aphidicola* str. Bp (Baizongia pistaciae)  
*Wigglesworthia glossinidia* endosymbiont of *Glossina brevipalpis*  
*Salmonella typhimurium* LT2  
*Escherichia coli* CFT073  
*Yersinia pestis* CO92  
*Yersinia pestis* KIM  
*Wigglesworthia glossinidia* endosymbiont of *Glossina brevipalpis*  
*Xylella fastidiosa* 9a5c  
*Xanthomonas campestris* pv. *campestris* str. ATCC 33913  
*Xanthomonas axonopodis* pv. *citri* str. 306  
*Pseudomonas aeruginosa* PAO1  
*Vibrio cholerae* O1 biovar *eltor* str. N16961  
*Pasteurella multocida* subsp. *multocida* str. Pm70  
*Haemophilus influenzae* Rd KW20  
*Escherichia coli* CFT073  
*Salmonella typhimurium* LT2  
*Yersinia pestis* CO92  
*Yersinia pestis* KIM  
*Buchnera aphidicola* str. Bp (Baizongia pistaciae)

ATP synthase, beta chain  
 ATP synthase beta chain  
 ATP synthase beta chain  
 ATP synthase beta chain  
 hypothetical protein WGLp008  
 ATP synthase F1, beta subunit  
 ATP synthase beta chain  
 F1-F0-type proton-ATPase subunit beta  
 ATP synthase beta subunit protein  
 membrane-bound ATP synthase, F1 sector, beta-subunit  
 AtpD  
 ATP synthase F1 subunit beta  
 ATP synthase beta chain  
 transcription termination factor  
 transcription termination factor Rho; polarity suppressor  
 transcription termination factor  
 Rho  
 transcription termination factor Rho  
 hypothetical protein WGLp303  
 transcription termination factor rho  
 needle complex secretion ATPase  
 needle complex: ATPase  
 putative type III secretion system ATP synthase  
 flagellum-specific ATP synthase  
 needle complex secretion ATPase  
 ATP synthase in type III secretion system  
 HrcN protein  
 HrpB6 protein  
 putative flagellum-specific ATP synthase  
 flagellum-specific ATP synthase  
 flagellar protein  
 flagellar protein  
 flagellum-specific ATP synthase FliI  
 flagellum-specific ATP synthase FliI  
 flagellum-specific ATP synthase  
 hypothetical protein WGLp057  
 flagellum-specific ATP synthase  
 Flagellum-specific ATP synthase  
 flagellum-specific ATP synthase  
 flagellum-specific ATP synthase  
 hypothetical protein WGLp006  
 ATP synthase, alpha chain  
 ATP synthase alpha chain  
 ATP synthase alpha chain  
 ATP synthase alpha chain  
 ATP synthase F1, alpha subunit  
 AtpA  
 ATP synthase F1 subunit alpha  
 ATP synthase alpha chain  
 F1-F0-type proton-ATPase subunit alpha  
 ATP synthase alpha subunit protein  
 membrane-bound ATP synthase, F1 sector, alpha-subunit  
 ATP synthase subunit alpha
